# Supplementary material for: Microalgae Harvesting after Tertiary Wastewater Treatment with White-Rot Fungi
Source: MDPI journal article supplement (doi:10.3390/jof8111232), 2022-11-21
Supplement: s1 [file s1]

## Microalgae harvesting after tertiary wastewater treatment with white-rot fungi

**Supplementary Figure S1** (a) *T. obliquus* suspension before bioflocculation; (b) Fungal culture (1) *Irpex lacteus*, (2) *Pleurotus dryinus*, (3) *Pleurotus ostreatus*, (4) *Trametes versicolor*, (5) *Pycnoporus cinnabarinus*, (6) *Trichoderma reesei* in liquid medium before adding to the *T. obliquus* suspension; (c) algal-fungal pellets formed in *T. obliquus*-fungi complex after 24 hours.

1

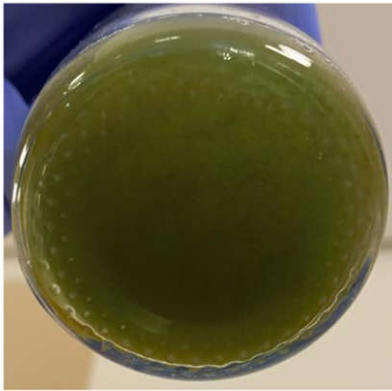

(a)

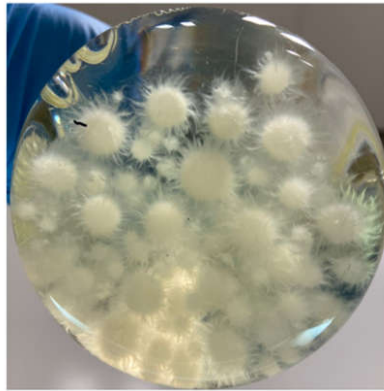

(b)

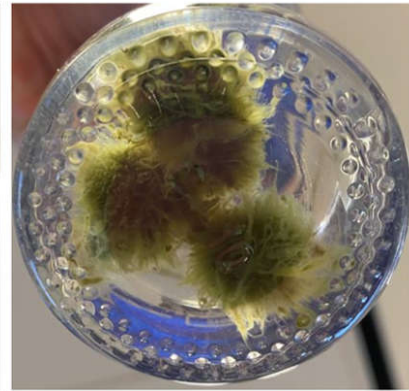

(c)

2

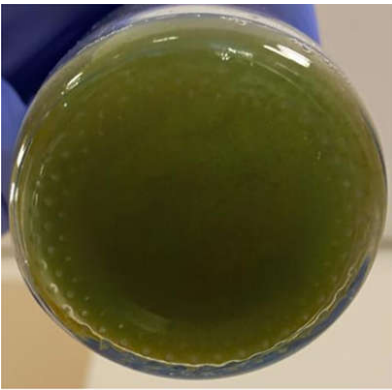

(a)

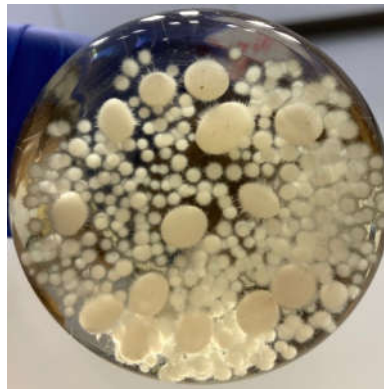

(b)

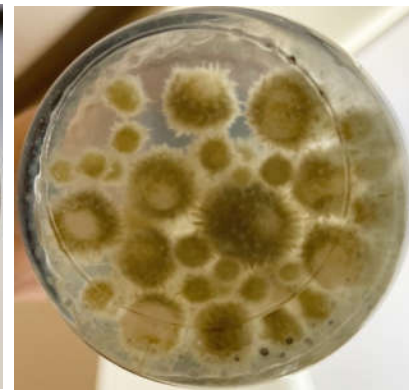

(c)

3

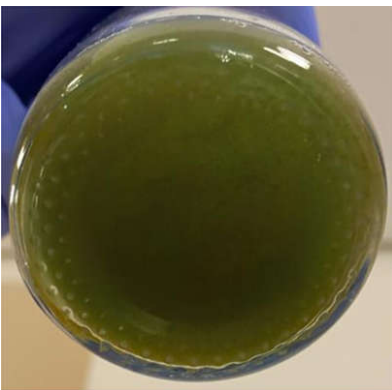

(a)

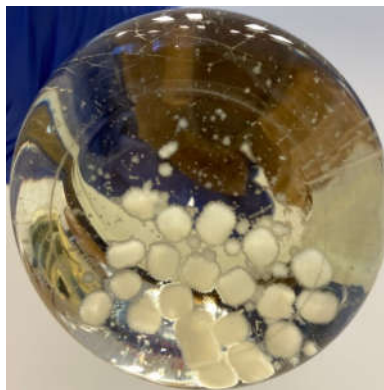

(b)

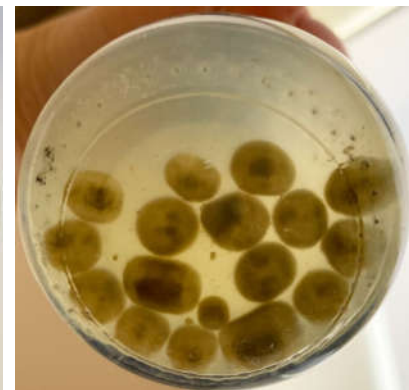

(c)

4

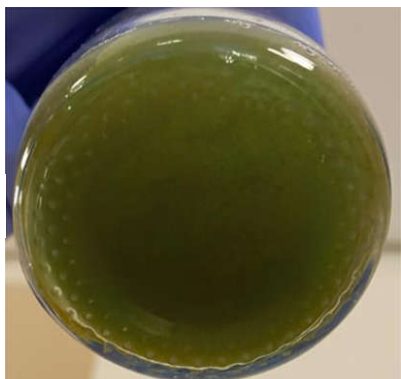

(a)

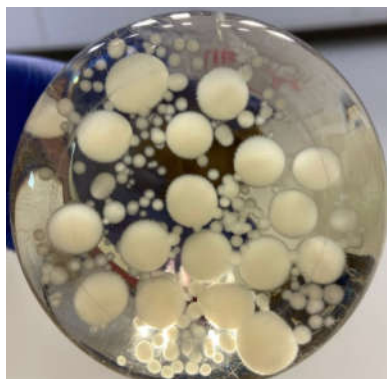

(b)

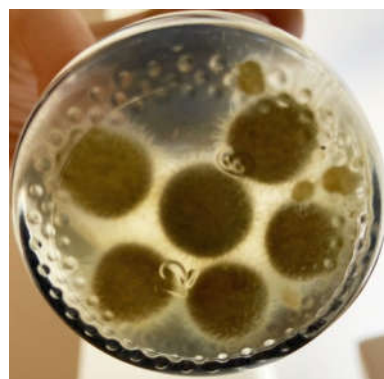

5

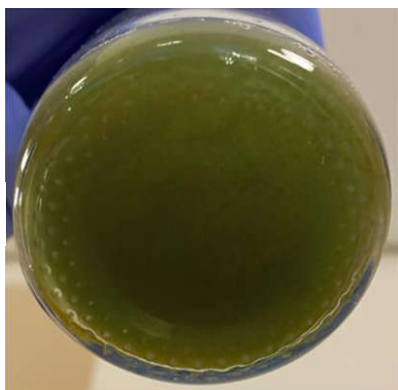

(a)

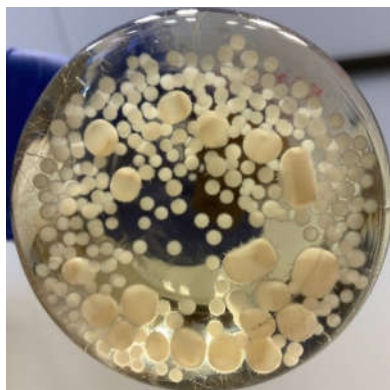

(b)

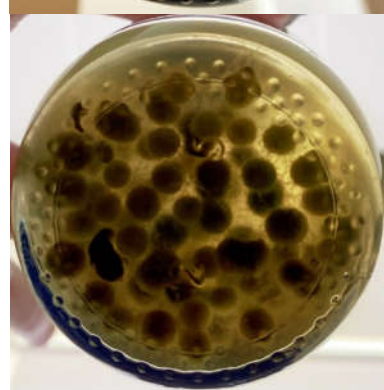

(c)

6

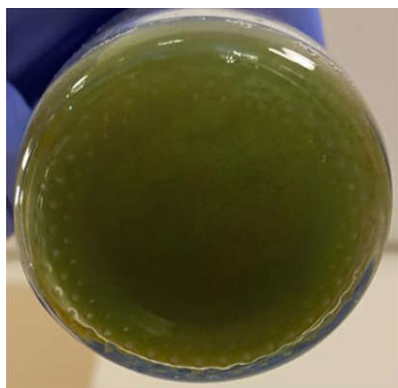

(a)

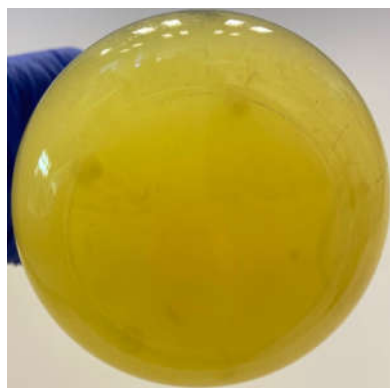

(b)

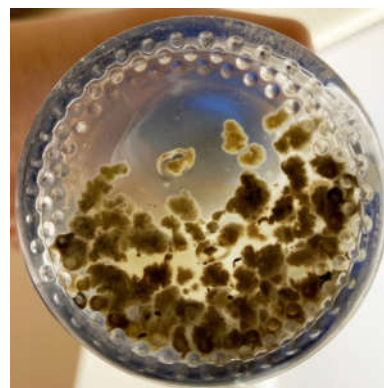

(c)
